# Supplementary material
Source: publisher site journal article supplement (https://www.dovepress.com/article/239222)
Supplement: Supplementary file 1 [file get_supplementary_file.php]

**Table S1**  Ingredients and RxNorm codes of medications included in the study

| **RxNorm code** | **Ingredient name** |
| --- | --- |
| 821601 | Acetaminophen/Aspirin/Caffeine/Codeine |
| 689552 | Acetaminophen/Aspirin/Caffeine/Codeine/salicylamide |
| 689555 | Acetaminophen/Aspirin/Codeine |
| 689561 | Acetaminophen/butalbital/Caffeine/Codeine |
| 689563 | Acetaminophen/butalbital/Codeine |
| 814657 | Acetaminophen/Caffeine/Codeine |
| 817430 | Acetaminophen/Caffeine/Codeine/Meprobamate |
| 689568 | Acetaminophen/Caffeine/Codeine/salicylamide |
| 817579 | Acetaminophen/Codeine |
| 817356 | Acetaminophen/Codeine/Ibuprofen |
| 1007238 | Aconite/Codeine/Erysimum preparation |
| 690996 | Aluminum Hydroxide/Aspirin/Codeine/Magnesium Hydroxide |
| 214237 | anhydrous calcium iodide/Codeine |
| 214160 | Aspirin/butalbital/Caffeine/Codeine |
| 689511 | Aspirin/Caffeine/Codeine |
| 689522 | Aspirin/Carisoprodol/Codeine |
| 135095 | Aspirin/Codeine |
| 1008493 | Benzoate/Codeine |
| 1008060 | Butalbital/Caffeine/Codeine |
| 691032 | Calcium iodide/Codeine |
| 2670 | Codeine |
| 1008110 | Codeine/Diclofenac |
| 1008954 | Codeine/Erysimum preparation |
| 1007477 | Codeine/Ethylmorphine |
| 710303 | Codeine/Ibuprofen |
| 214443 | Codeine/iodinated glycerol |
| 729517 | Codeine/Kaolin |
| 690089 | Codeine/Papaverine |
| 1007293 | Codeine/Potassium |
| 690096 | Codeine/potassium citrate |
| 1007204 | Codeine/propyphenazone |
| 690101 | Codeine/Pyrilamine |
| 689569 | Acetaminophen/Caffeine/dihydrocodeine |
| 151196 | Acetaminophen/dihydrocodeine |
| 689783 | Acetaminophen/dihydrocodeine/salicylamide |
| 689512 | Aspirin/Caffeine/dihydrocodeine |
| 23088 | Dihydrocodeine |
| 352362 | Acetaminophen/Tramadol |
| 10689 | Tramadol |

**Table S2**  Ingredient names and RxNorm codes of strong or moderately strong *CYP2D6* inhibitors included in the study

| **RxNorm code** | **Ingredient name** | **Strength of inhibitor** (21) |
| --- | --- | --- |
| 42347 | Bupropion | Strong |
| 1551467 | Bupropion / Naltrexone | Strong |
| 4493 | Fluoxetine | Strong |
| 611247 | Fluoxetine / Olanzapine | Strong |
| 32937 | Paroxetine | Strong |
| 1040053 | Dextromethorphan / Quinidine | Strong |
| 9068 | Quinidine | Strong |
| 1007942 | Quinidine / Verapamil | Strong |
| 1721552 | Florfenicol / Mometasone / Terbinafine | Strong |
| 37801 | Terbinafine | Strong |
| 818150 | Alginic acid / Cimetidine | Moderate |
| 2541 | Cimetidine | Moderate |
| 407990 | Cinacalcet | Moderate |
| 72625 | Duloxetine | Moderate |
| 42355 | Fluvoxamine | Moderate |
| 1300786 | Mirabegron | Moderate |

**Table S3**  Risk of poor pain control or adverse reactions by sex, race, and ethnicity

| **Characteristic** |  | **Poor pain control** | | **Adverse reactions** | |
| --- | --- | --- | --- | --- | --- |
| Total | N | *p*-value | N | *p*-value |
| **Total** | 2,877 | 117 (4.1) |  | 198 (6.9) |  |
|  |  |  |  |  |  |
| **Sex, n (%)** |  |  |  |  |  |
| Male | 1,186 | 51 (4.3) | 0.596 | 61 (5.1) | 0.002 |
| Female | 1,691 | 66 (3.9) |  | 137 (8.1) |  |
|  |  |  |  |  |  |
| **Race, n (%)** |  |  |  |  |  |
| White | 2,706 | 112 (4.1) | 0.038 | 185 (6.8) | 0.158 |
| Black | 11 | 2 (18.2) |  | 2 (18.2) |  |
| Asian/Pac. islander | 23 | 0 (0) |  | 2 (8.7) |  |
| Unknown | 137 | 3 |  | 9 |  |
|  |  |  |  |  |  |
| **Ethnicity, n (%)** |  |  |  |  |  |
| Non-Hispanic | 2,839 | 116 (4.1) | --- | 196 (6.9) | 0.815 |
| Hispanic | 34 | 0 (0) |  | 2 (5.9) |  |
| Unknown | 4 | 1 |  | 0 |  |

**Figure S1** Adverse reactions and poor pain control related to opioid use extracted from electronic health records


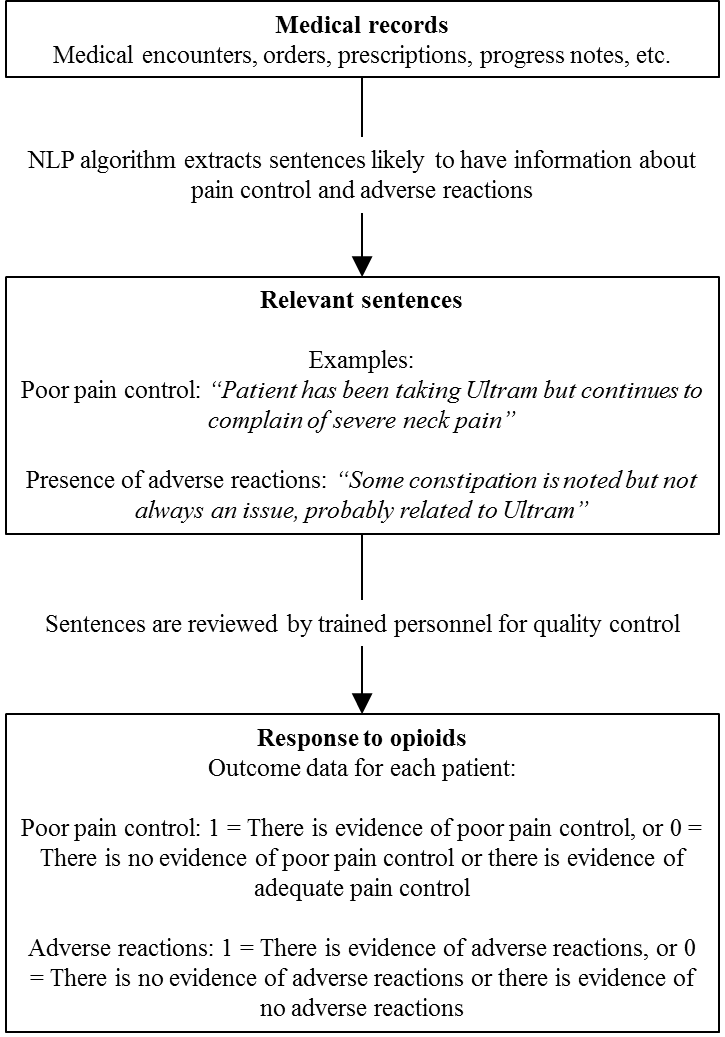


**Figure S2** *CYP2D6* activity scores of participants who experienced vs did not experience adverse reactions or poor pain control (*n* = 2,788).


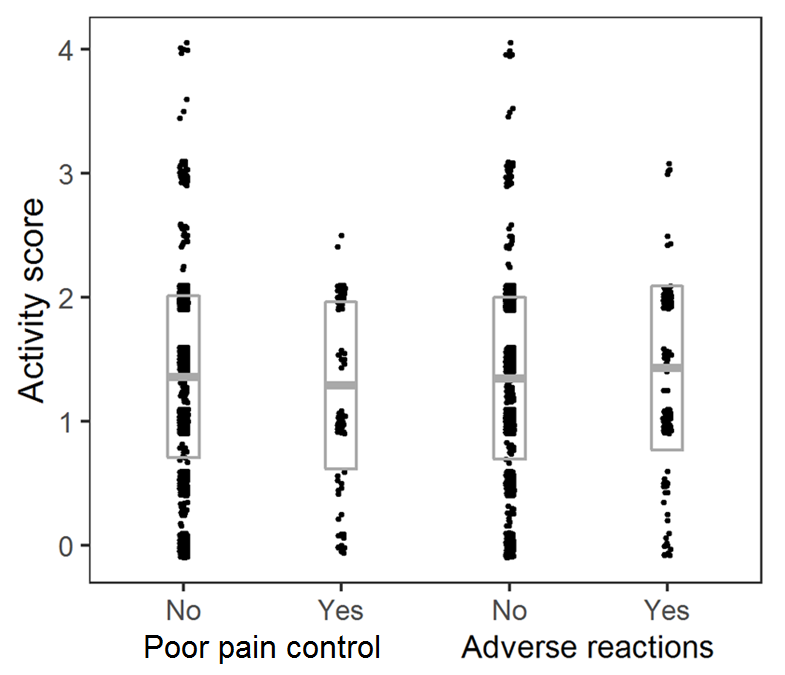


**Note:** Bars represent means and standard deviations.

**Figure S3** Risk of adverse reactions or poor pain control between each CYP2D6 metabolizer status relative to a normal and intermediate to normal metabolizer status by sex

**
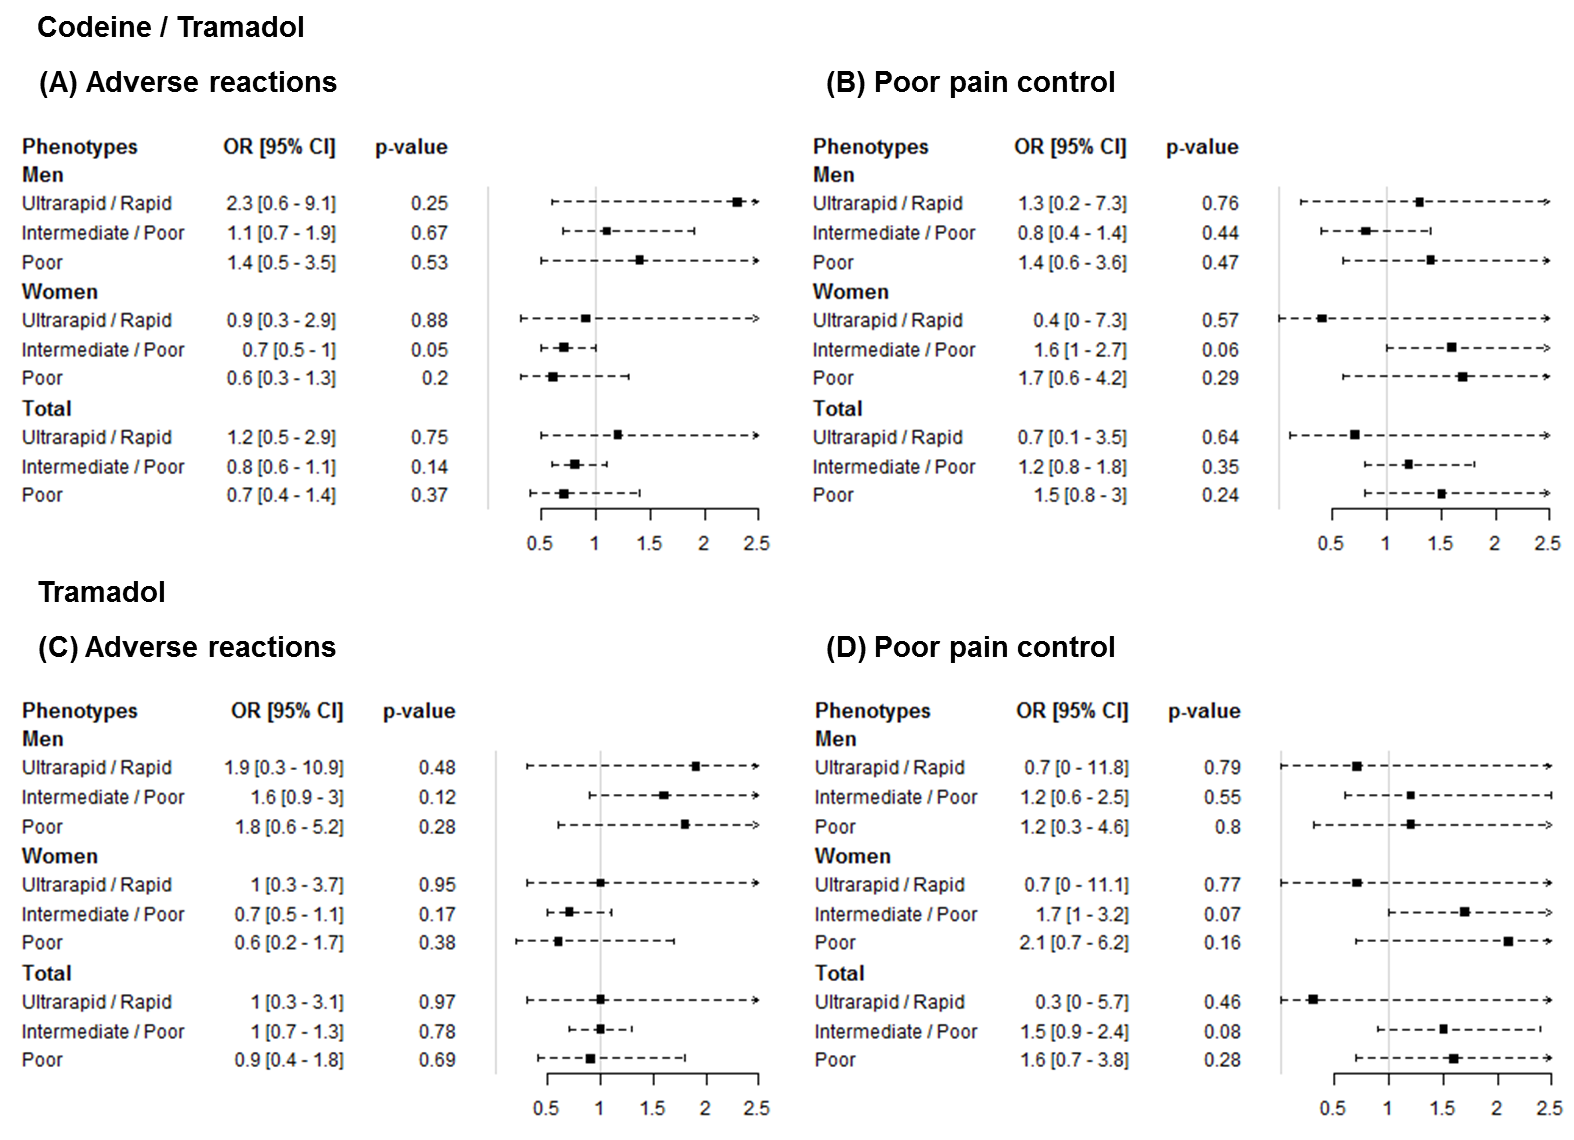
**

Note: Estimates and *p*-values adjusted for age, race, and ethnicity.
